# Supplementary material
Source: Research Square preprint supplement (doi:10.21203/rs.3.rs-9241029/v1)
Supplement: Supplementary file 1 [file 5eea0182caf28513cd797393.docx]

**Supplementary Materials**

**Biosensor-driven evolution and metabolic engineering of an *Escherichia coli***

**cell factory for L-tryptophan production**

Rongshuai Zhua, b#, Zhenqiang Zhaoc#, Weijun Shaoa,b, Jin Hana,b, Jiajia Youa,b, Xuewei Pana,b, Minglong Shaoa,b, Zhiming Raoa, b*

# These authors contributed equally: Rongshuai Zhu, Zhenqiang Zhao

a Key Laboratory of Industrial Biotechnology of the Ministry of Education, Laboratory of Applied Microorganisms and Metabolic Engineering, School of Biotechnology, Jiangnan University, Wuxi 214122, China.

b Institute of Future Food Technology, JITRI, Yixing 214200, China.

c College of Life Sciences, Qingdao Agricultural University, Qingdao, China.

***** Correspondence to: Zhiming Rao, Email: [**raozhm@jiangnan.edu.cn**](mailto:raozhm@jiangnan.edu.cn); Key Laboratory of Industrial Biotechnology of the Ministry of Education, Laboratory of Applied Microorganisms and Metabolic Engineering, School of Biotechnology, Jiangnan University, Wuxi 214122, China.

**
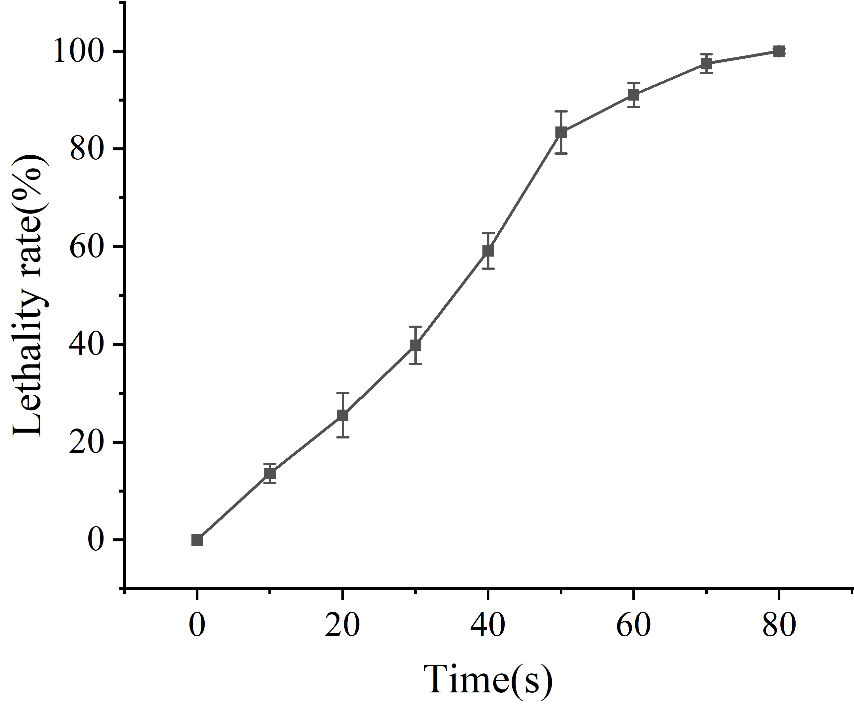
**

Fig. S1 Lethality rate of strains under different irradiation time of ARTP.

**
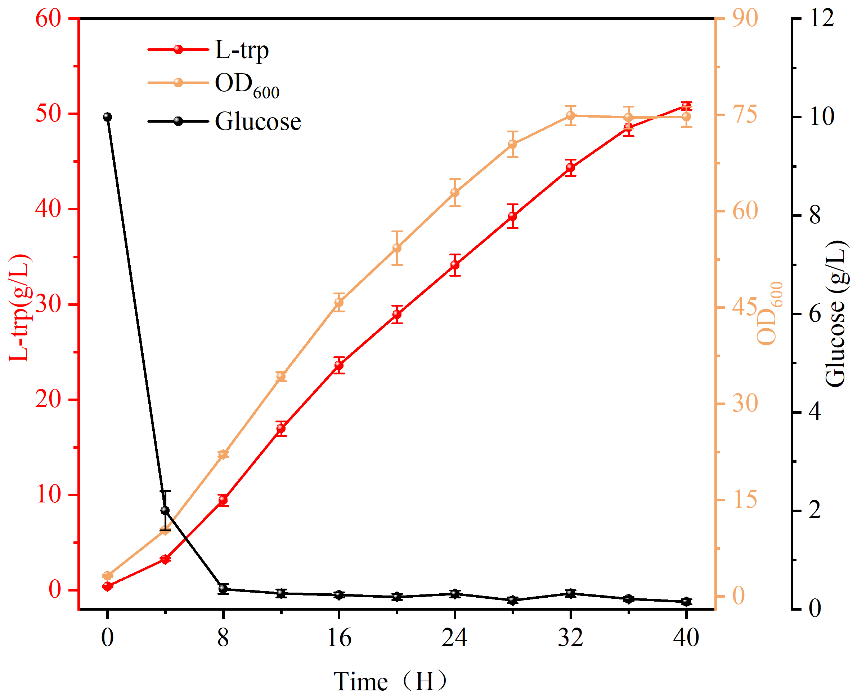
**

Fig. S2 Fed-batch fermentation of W-24 in 5 L bioreactor.


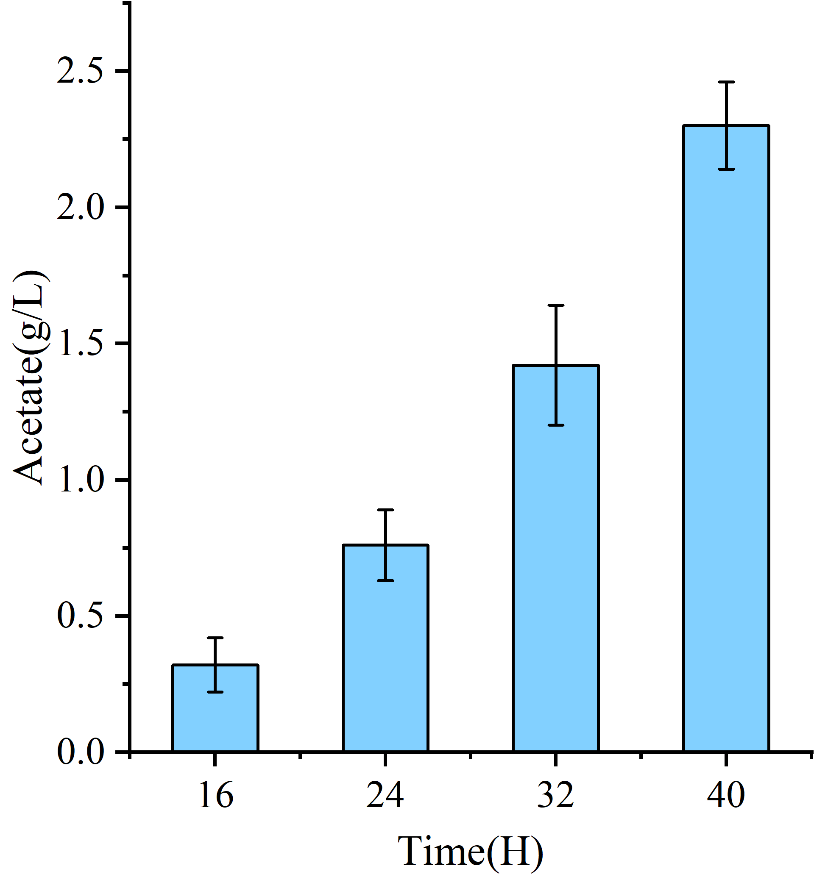


Fig. S3 The acetate titer of W-24 fed-batch fermentation in 5 L bioreactor.

**Table S1. Strains used in this study.**

| **Strains** | **Characteristics** | **Source** |
| --- | --- | --- |
| *E. coli* DH5α | The cloning host | This lab |
| *E. coli* W3110 | Wild type, the starting strain | This lab |
| *Bacillus subtilis* | Wild type | This lab |
| *Corynebacterium glutamicum* | Wild type | This lab |
| *Serratia marcescens* | Wild type | This lab |
| W-1 | *E. coli* W3110, *ΔtnaAΔtnaBΔtyrA* | This study |
| W-2 | W-1, *aroGK194T:: aroG* | This study |
| W-3 | W-1, *lacI::* Ptrc*-aroGS180F* | This study |
| W-4 | W-3, *trpR::* Ptrc*-trpES40FDCBA* | This study |
| W-5 | W-4, *yjiT::* Ptrc*-ppsA* | This study |
| W-6 | W-5, *ΔldhAΔpflBΔpoxB* | This study |
| W-7 | W-6, *ycdN::* Ptrc*-zwf* | This study |
| W-8 | W-7, *yncK::* Ptrc*-tktA* | This study |
| W-9 | W-8, *gltA ::* PfliC*-gltA* | This study |
| W-10 | W-8, *ΔiclR* | This study |
| W-11 | W-10, *ΔycdW::* Ptrc*-aceAaceB* | This study |
| W-12 | W-8, *tfaD::* Ptrc*-pyc P458S* | This study |
| W-13 | W-12, *yeeP::* Ptrc*-pck* | This study |
| W-14 | W-11, *yeeP::* Ptrc*-pck* | This study |
| W-15 | W-14, *ychG::* Ptrc*-glnAL159I,E304A* | This study |
| W-16 | W-14, *wbbL::* Ptrc*-serAH344A,N346A,N364A* | This study |
| W-17 | W-14, *ΔpurR* | This study |
| W-18 | W-17, pTrc99A*-Ecprs* | This study |
| W-19 | W-17, pTrc99A -*Bsprs* | This study |
| W-20 | W-17, pTrc99A -*Cgprs* | This study |
| W-21 | W-17, pTrc99A -*Smprs* | This study |
| W-17-111 | W-17, *yjiP::*H*glnL159I,E304A*-H*serAH344A,N346A,N364A*-H*prs* | This study |
| W-17-112 | W-17, *yjiP::*H*glnL159I,E304A*-H*serAH344A,N346A,N364A*-M*prs* | This study |
| W-17-113 | W-17, *yjiP::*H*glnL159I,E304A*-H*serAH344A,N346A,N364A*-L*prs* | This study |
| W-17-121 | W-17, *yjiP::*H*glnL159I,E304A*-M*serAH344A,N346A,N364A*-H*prs* | This study |
| W-17-122 | W-17, *yjiP::*H*glnL159I,E304A*-M*serAH344A,N346A,N364A*-M*prs* | This study |
| W-17-123 | W-17, *yjiP::*H*glnL159I,E304A*-M*serAH344A,N346A,N364A*-L*prs* | This study |
| W-17-131 | W-17, *yjiP::*H*glnL159I,E304A*-L*serAH344A,N346A,N364A*-H*prs* | This study |
| W-17-132 | W-17, *yjiP::*H*glnL159I,E304A*-L*serAH344A,N346A,N364A*-M*prs* | This study |
| W-17-133 | W-17, *yjiP::*H*glnL159I,E304A*-L*serAH344A,N346A,N364A*-L*prs* | This study |
| W-17-211 | W-17, *yjiP::*M*glnL159I,E304A*-H*serAH344A,N346A,N364A*-H*prs* | This study |
| W-17-212  (W-22) | W-17, *yjiP::*M*glnL159I,E304A*-H*serAH344A,N346A,N364A*-M*prs* | This study |
| W-17-213 | W-17, *yjiP::*M*glnL159I,E304A*-H*serAH344A,N346A,N364A*-L*prs* | This study |
| W-17-221 | W-17, *yjiP::*M*glnL159I,E304A*-M*serAH344A,N346A,N364A*-H*prs* | This study |
| W-17-222 | W-17, *yjiP::*M*glnL159I,E304A*-M*serAH344A,N346A,N364A*-M*prs* | This study |
| W-17-223 | W-17, *yjiP::*M*glnL159I,E304A*-M*serAH344A,N346A,N364A*-L*prs* | This study |
| W-17-231 | W-17, *yjiP::*M*glnL159I,E304A*-L*serAH344A,N346A,N364A*-H*prs* | This study |
| W-17-232 | W-17, *yjiP::*M*glnL159I,E304A*-L*serAH344A,N346A,N364A*-M*prs* | This study |
| W-17-233 | W-17, *yjiP::*M*glnL159I,E304A*-L*serAH344A,N346A,N364A*-L*prs* | This study |
| W-17-311 | W-17, *yjiP::*L*glnL159I,E304A*-H*serAH344A,N346A,N364A*-H*prs* | This study |
| W-17-312 | W-17, *yjiP::*L*glnL159I,E304A*-H*serAH344A,N346A,N364A*-M*prs* | This study |
| W-17-313 | W-17, *yjiP::*L*glnL159I,E304A*-H*serAH344A,N346A,N364A*-L*prs* | This study |
| W-17-321 | W-17, *yjiP::*L*glnL159I,E304A*-M*serAH344A,N346A,N364A*-H*prs* | This study |
| W-17-322 | W-17, *yjiP::*L*glnL159I,E304A*-M*serAH344A,N346A,N364A*-M*prs* | This study |
| W-17-323 | W-17, *yjiP::*L*glnL159I,E304A*-M*serAH344A,N346A,N364A*-L*prs* | This study |
| W-17-331 | W-17, *yjiP::*L*glnL159I,E304A*-L*serAH344A,N346A,N364A*-H*prs* | This study |
| W-17-332 | W-17, *yjiP::*L*glnL159I,E304A*-L*serAH344A,N346A,N364A*-M*prs* | This study |
| W-17-333 | W-17, *yjiP::*L*glnL159I,E304A*-L*serAH344A,N346A,N364A*-L*prs* | This study |
| W-23 | W-24, *ilvG::* *tnaB* | This study |
| W-24 | W-25, *ycgH::* Ptrc*-yddG* | This study |

**Table S2. Plasmids used in this study.**

| **Plasmids** | **Characteristics** | **Source** |
| --- | --- | --- |
| pEcCpf1 | Cas12a and λ Red recombinase expression vector, Kanr | This Lab |
| pcrEG | The crRNA expression vector, Sper | This Lab |
| pcrEG-*aroG1* | pcrEG derivative, *aroG1-*crRNA-TTTC | This study |
| pcrEG-*aroG2* | pcrEG derivative, *aroG2-*crRNA-TTTA | This study |
| pcrEG-*lacI* | pcrEG derivative, *lacI-*crRNA-TTTC | This study |
| pcrEG-*trpR* | pcrEG derivative, *trpR-*crRNA-TTTA | This study |
| pcrEG-*yjiT* | pcrEG derivative, *yjiT-*crRNA-TTTC | This study |
| pcrEG-*ldhA* | pcrEG derivative, *ldhA-*crRNA-TTTG | This study |
| pcrEG-*pflB* | pcrEG derivative, *pflB-*crRNA-TTTG | This study |
| pcrEG-*poxB* | pcrEG derivative, *poxB-*crRNA-TTTA | This study |
| pcrEG-*ycdN* | pcrEG derivative, *ycdN-*crRNA-TTTG | This study |
| pcrEG-*yncK* | pcrEG derivative, *yncK-*crRNA-TTTG | This study |
| pcrEG-*gltA* | pcrEG derivative, *gltA-*crRNA-TTTC | This study |
| pcrEG-*iclR* | pcrEG derivative, *iclR-*crRNA-TTTA | This study |
| pcrEG-*ycdW* | pcrEG derivative, *ycdW-*crRNA-TTTC | This study |
| pcrEG-*tfaD* | pcrEG derivative, *tfaD-*crRNA-TTTA | This study |
| pcrEG-*yeeP* | pcrEG derivative, *yeeP-*crRNA-TTTA | This study |
| pcrEG-*ychG* | pcrEG derivative, *ychG-*crRNA-TTTA | This study |
| pcrEG-*wbbL* | pcrEG derivative, *wbbL-*crRNA-TTTA | This study |
| pcrEG-*purR* | pcrEG derivative, *purR-*crRNA-TTTG | This study |
| pcrEG-*yjiP* | pcrEG derivative, *yjiP-*crRNA-TTTA | This study |
| pcrEG-*ilvG* | pcrEG derivative, *ilvG-*crRNA-TTTA | This study |
| pcrEG-*ycgH* | pcrEG derivative, *ycgH-*crRNA-TTTC | This study |
| pTrc99a | The expression vector, trc promoter, Ampr | This Lab |
| pTrc99a-Ecprs | pTrc99a derivative, *Ecprs* from *E. coli* | This study |
| pTrc99a-Bsprs | pTrc99a derivative, *Bsprs* from *B. subtilis* | This study |
| pTrc99a-Cgprs | pTrc99a derivative, *Cgprs* from *C. glutamicum* | This study |
| pTrc99a-Smprs | pTrc99a derivative, *Smprs* from *S. marcescens* | This study |

**Table S3. Primers used in this study.**

| **Primer** | **Sequence (5’-3’)** |
| --- | --- |
| aroG1-crRNA-F | AGATTCGATATGATCACCCCACAATAT |
| aroG1-crRNA-R | AATTATATTGTGGGGTGATCATATCGA |
| aroG2-crRNA-F | AGATCGCATCAAAGACTGCATCGGCTG |
| aroG2-crRNA-R | AATTCAGCCGATGCAGTCTTTGATGCG |
| lacI-crRNA-F | AGATTTGATGTCTCTGACCAGACACCC |
| lacI-crRNA-R | AATTGGGTGTCTGGTCAGAGACATCAA |
| trpR-crRNA-F | AGATCCGTTGTTAAACCTGATGCTGAC |
| trpR-crRNA-R | AATTGTCAGCATCAGGTTTAACAACGG |
| yjiT-crRNA-F | AGATATTCACCGCCACAGAGCTTGGTA |
| yjiT-crRNA-R | AATTTACCAAGCTCTGTGGCGGTGAAT |
| ldhA-crRNA-F | AGATAAGATAAATCCAACGACGTGATC |
| ldhA-crRNA-R | AATTGATCACGTCGTTGGATTTATCTT |
| pflB-crRNA-F | AGATGTAACAATGATCCGCGTGTAGAT |
| pflB-crRNA-R | AATTATCTACACGCGGATCATTGTTAC |
| poxB-crRNA-F | AGATGCTAAACCGAGCGAGAAAGCCAT |
| poxB-crRNA-R | AATTATGGCTTTCTCGCTCGGTTTAGC |
| ycdN-crRNA-F | AGATTTCCGTTTCTCATTATGTTGCGC |
| ycdN-crRNA-R | AATTGCGCAACATAATGAGAAACGGAA |
| yncK-crRNA-F | AGATTTAATTAACTATCCTCCCAAACT |
| yncK-crRNA-R | AATTAGTTTGGGAGGATAGTTAATTAA |
| gltA-crRNA-F | AGATCGTCGCGACTCGCATCCAATGGC |
| gltA-crRNA-R | AATTGCCATTGGATGCGAGTCGCGACG |
| iclR-crRNA-F | AGATACGCGTGGCCTGAAATTACTGGA |
| iclR-crRNA-R | AATTTCCAGTAATTTCAGGCCACGCGT |
| ycdW-crRNA-F | AGATCGCTGCGTTGCTGGAGTCGAACC |
| ycdW-crRNA-R | AATTGGTTCGACTCCAGCAACGCAGCG |
| tfaD-crRNA-F | AGATTAGAGCATAAGCAGCGCAACACC |
| tfaD-crRNA-R | AATTGGTGTTGCGCTGCTTATGCTCTA |
| yeeP-crRNA-F | AGATCCGGTGCGGTGGACCGGATATTT |
| yeeP-crRNA-R | AATTAAATATCCGGTCCACCGCACCGG |
| ychG-crRNA-F | AGATCCGGGGGACATGGTTATCTGGAT |
| ychG-crRNA-R | AATTATCCAGATAACCATGTCCCCCGG |
| wbbL-crRNA-F | AGATTGTACTGTGAAGATATTGACCTG |
| wbbL-crRNA-R | AATTCAGGTCAATATCTTCACAGTACA |
| purR-crRNA-F | AGATCTGGCGACCAGCAGCGAAGCGGC |
| purR-crRNA-R | AATTGCCGCTTCGCTGCTGGTCGCCAG |
| yjiP-crRNA-F | AGATAAACCTTTCTCACGCACCCTGAC |
| yjiP-crRNA-R | AATTGTCAGGGTGCGTGAGAAAGGTTT |
| ilvG-crRNA-F | AGATTCGGCACTGACGCATTTCAGGAA |
| ilvG-crRNA-R | AATTTTCCTGAAATGCGTCAGTGCCGA |
| ycgH-crRNA-F | AGATGAATATCAACTAAAACAACAAGG |
| ycgH-crRNA-R | AATTCCTTGTTGTTTTAGTTGATATTC |
| Ecprs-99a-F | ACACAGGAAACAGACCATGGTGCCTGATATGAAGCTTTTTGCTG |
| Ecprs-99a-R | ATCCGCCAAAACAGCCTTAGTGTTCGAACATGGCAGAGATC |
| Bsprs-99a-F | CAGGAAACAGACCATGATGAGCAACCAGTACGGCG |
| Bsprs-99a-R | TCCGCCAAAACAGCCTTAGCTAAACAGATAGCTCACGCTC |
| Cgprs-99a-F | CAGGAAACAGACCATGATGAGCCGCATGTTTAGCATTAC |
| Cgprs-99a-R | ATCCGCCAAAACAGCCTTAGTTTTCCGCTTTCGGTTCTTC |
| Smprs-99a-F | CAGGAAACAGACCATGGTGCCGGATATGAAACTGTTTGC |
| Smprs-99a-R | ATCCGCCAAAACAGCCTTAATGTTCAAACATCGCGCTAATGGA |
