# Supplementary material
Source: Research Square preprint supplement (doi:10.21203/rs.3.rs-9241029/v1)
Supplement: Supplementary file 1 [file 50e63dd417e8e221f680e4ba.xlsx]

## Sheet: Sheet1
Type	Position	Ref	Obs	Func	Gene	Kegg_Gene_Name	Kegg_Definition
INDEL	27490	C	-	exonic	b0030	rihC	non-specific riboncleoside hydrolase
SNV	633732	A	G	exonic	b0600	ybdL	methionine transaminase
SNV	696290	C	A	exonic	b0662	ubiF	2-octaprenyl-3-methyl-6-methoxy-1,4-benzoquinol hydroxylase
SNV	786634	A	C	exonic	b0754	aroG	3-deoxy-7-phosphoheptulonate synthase
SNV	811978	A	G	upstream;downstream	b0777(dist=45),b0776(dist=22)	bioC,bioF	malonyl-CoA O-methyltransferase;8-amino-7-oxononanoate synthase
SNV	926840	T	C	exonic	b0884	infA	translation initiation factor IF-1
SNV	931807	C	T	exonic	b0888	trxB	thioredoxin reductase (NADPH)
INDEL	1026158	-	A	exonic	b0970	yccA	modulator of FtsH protease
SNV	1289282	G	T	upstream	b1238,b1237(dist=24)	tdk,hns	thymidine kinase;DNA-binding protein H-NS
SNV	1340726	C	A	exonic	b1284	yciT	DNA-binding transcriptional dual regulator YciT
SNV	1382883	T	A	exonic	b1322	ycjF	putative membrane protein
SNV	1432872	A	T	exonic	b1377	ompN	outer membrane protein N
SNV	1826880	C	G	exonic	b1747	astA	arginine N-succinyltransferase
SNV	1850476	A	T	upstream;downstream	b1769(dist=24),b1770(dist=93)	ydjE,ydjF	MFS transporter, putative metabolite:H+ symporter;putative DNA-binding transcriptional regulator YdjF
SNV	2029203	T	C	exonic	b1961	dcm	DNA (cytosine-5)-methyltransferase 1
SNV	2093324	A	C	exonic	b2025	hisF	cyclase
SNV	2218172	C	T	exonic	b2132	bglX	beta-glucosidase
SNV	2226457	T	G	exonic	b2143	cdd	cytidine deaminase
SNV	2276629	G	C	exonic	b2185	rplY	large subunit ribosomal protein L25
SNV	2349905	C	A	exonic	b2242	glpB	glycerol-3-phosphate dehydrogenase subunit B
SNV	2391014	G	T	exonic	b2280	nuoJ	NADH-quinone oxidoreductase subunit J
SNV	2424697	T	C	upstream;downstream	b2311(dist=42),b2312(dist=53)	ubiX,purF	flavin prenyltransferase;amidophosphoribosyltransferase
SNV	2428438	A	G	exonic	b2315	folC	dihydrofolate synthase / folylpolyglutamate synthase
SNV	2473492	T	G	exonic	b2364	dsdC	LysR family transcriptional regulator, D-serine deaminase activator
SNV	2583441	C	T	exonic	b2478	dapA	4-hydroxy-tetrahydrodipicolinate synthase
SNV	2652846	G	C	exonic	b2537	hcaR	LysR family transcriptional regulator, hca operon transcriptional activator
INDEL	2723841	GATG	-	exonic	b2600	tyrA	chorismate mutase / prephenate dehydrogenase
SNV	3034705	G	A	exonic	b2905	gcvT	aminomethyltransferase
SNV	3302865	T	C	exonic	b3169	nusA	N utilization substance protein A
SNV	3313842	T	C	upstream;downstream	b3181	greA	transcription elongation factor GreA
SNV	3429006	A	T	exonic	b3992	thiF	sulfur carrier protein ThiS adenylyltransferase
SNV	3466789	C	A	exonic	b3958	argC	N-acetyl-gamma-glutamyl-phosphate reductase
SNV	3664394	T	C	upstream	b3773,b3774 (dist=45)	ilvY,ilvC	LysR family transcriptional regulator, positive regulator for ilvC;ketol-acid reductoisomerase
INDEL	3734460	AACCAGG	-	exonic	b3709	tnaB	low affinity tryptophan permease
INDEL	3734466	GTGTT	-	exonic	b3708	tnaA	tryptophanase
SNV	3749427	G	T	exonic	b4477	dgoA	2-dehydro-3-deoxyphosphogalactonate aldolase
SNV	4022490	C	A	exonic	b3464	ftsY	fused signal recognition particle receptor
SNV	4035708	C	G	exonic	b3451	ugpE	sn-glycerol 3-phosphate transport system permease protein
SNV	4036267	T	A	exonic	b3451	ugpE	sn-glycerol 3-phosphate transport system permease protein
SNV	4085716	A	C	upstream;downstream	b3408(dist=193),b3407(dist=264)	feoA, yhgF	ferrous iron transport protein A;putative RNA-binding protein YhgF
SNV	4089895	C	G	exonic	b3404	envZ	two-component system, OmpR family, osmolarity sensor histidine kinase EnvZ
SNV	4187559	G	T	exonic	b3291	mscL	large conductance mechanosensitive channel
SNV	4245477	A	C	upstream	b4041,b4042(dist=20)	plsB,dgkA	glycerol-3-phosphate O-acyltransferase;diacylglycerol kinase (ATP)
SNV	4307030	C	G	exonic	b4095	phnM	alpha-D-ribose 1-methylphosphonate 5-triphosphate diphosphatase
INDEL	4338344	T	-	exonic	b4123	dcuB	anaerobic C4-dicarboxylate transporter DcuB
SNV	4393487	T	A	exonic	b4175	hflC	membrane protease subunit HflC
INDEL	4622824	G	-	exonic	b4393	trpR	TrpR family transcriptional regulator, trp operon repressor
		Ref	Reference sequence of E. coli W3110
		Obs	Observed sequences of E. coli W-1
